# Supplementary material
Source: MDPI journal article supplement (https://www.mdpi.com/2409-515X/8/4/60)
Supplement: s1 [file s1]

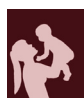

Supplementary

# Inconsistent Provider Testing Practices for Congenital Cytomegalovirus: Missed Diagnoses and Missed Opportunities

Kate L. Wilson <sup>1,2,\*</sup>, Kimi Shah <sup>2</sup> and Megan H. Pesch <sup>2,3,\*</sup>

**Table S1.** Laboratory tests used to identify infants tested for congenital CMV at a quaternary health system in the United States from 2014-2019.

| Keyword         | Order/Result Name in DataDirect [11]                                                                                              | Order, Result/ LI-ONC? (as noted in Data-Direct) | CPT Code       | Include or Exclude         | Reason/Notes                                                  |
|-----------------|-----------------------------------------------------------------------------------------------------------------------------------|--------------------------------------------------|----------------|----------------------------|---------------------------------------------------------------|
| Cytomegalovirus | CYTOMEGALOVIRUS CULTURE [Order: CMVCULT]                                                                                          | Order                                            | 87254 or 87252 | Exclude (order not result) | Culture of urine/CSF/serum can be used for infant CMV testing |
| Cytomegalovirus | Cytomegalovirus by Rapid PCR [Order: LCCMV]                                                                                       | Order                                            | 87254 or 87252 | Exclude (order not result) |                                                               |
| Cytomegalovirus | Cytomegalovirus DNA, Qual [Order: PCRCV]                                                                                          | Order                                            | 87496          | Exclude (order not result) |                                                               |
| Cytomegalovirus | Cytomegalovirus DNA, Quantitation [Order: OCMV]                                                                                   | Order                                            | 87497          | Exclude (order not result) |                                                               |
| Cytomegalovirus | Cytomegalovirus IgG, Qual [Order: CMVG]                                                                                           | Order                                            | 86644          | Exclude (order not result) | Not a sensitive or specific test, but can be used in infants  |
| Cytomegalovirus | Cytomegalovirus IgM, Qual [Order: CMVM]                                                                                           | Result                                           | 86645          | Include                    |                                                               |
| Cytomegalovirus | Cytomegalovirus by Rapid PCR [Result: LCCMV]                                                                                      | Result                                           | 87254 or 87252 | Include                    | Urine PCR send-out                                            |
| Cytomegalovirus | CYTOMEGALOVIRUS CULTURE [Result: CMVCULT]                                                                                         | Result                                           | 87254 or 87252 | Include                    |                                                               |
| Cytomegalovirus | Cytomegalovirus DNA, Qual [Result: PCRCV]                                                                                         | Result                                           | 87496          | Include                    |                                                               |
| Cytomegalovirus | Cytomegalovirus [Presence] in Unspecified specimen by Organism specific culture [LOINC: 5838-8]                                   | Result                                           | 87254 or 87252 | Include                    |                                                               |
| Cytomegalovirus | Cytomegalovirus DNA [# /volume] (viral load) in Bone marrow by Probe and target amplification method [LOINC: 49350-2]             | Result                                           | 87496          | Exclude                    | Not used for congenital CMV                                   |
| Cytomegalovirus | Cytomegalovirus DNA [Units/volume] (viral load) in Unspecified specimen by Probe and target amplification method [LOINC: 34720-3] | Result                                           | 87496          | Include                    |                                                               |
| Cytomegalovirus | Cytomegalovirus IgG Ab [Interpretation] in Serum [LOINC: 20475-0]                                                                 | Result                                           | 86644          | Include                    |                                                               |
| Cytomegalovirus | Cytomegalovirus IgG Ab [Presence] in Serum by Immuno-                                                                             | Result                                           | 86644          | Include                    |                                                               |

|                        |                                                                                         |        |       |                               |                                                                                                        |
|------------------------|-----------------------------------------------------------------------------------------|--------|-------|-------------------------------|--------------------------------------------------------------------------------------------------------|
| Assay [LOINC: 13949-3] |                                                                                         |        |       |                               |                                                                                                        |
| Cytomegalovirus        | Cytomegalovirus IgG Ab [Units/volume] in Serum or Plasma by Immunoassay [LOINC: 5124-3] | Result |       | Include                       |                                                                                                        |
| Cytomegalovirus        | Cytomegalovirus IgM Ab [Presence] in Serum by Immunofluorescence [LOINC: 49539-0]       | Result | 86645 | Include                       |                                                                                                        |
| Cytomegalovirus        | Cytomegalovirus IgM Ab [Presence] in Serum or Plasma by Immunoassay [LOINC: 24119-0]    | Result | 86645 | Include                       |                                                                                                        |
| CMV                    | CMV ANTIGENEMIA CMV AVR, Plasma [Order: VCAVR]                                          | Order  | 87496 | Exclude<br>(order not result) |                                                                                                        |
| CMV                    | CMV DNA qPCR [Order: VCMV]                                                              | Order  | 87497 | Exclude<br>(order not result) |                                                                                                        |
| CMV                    | CMV DNA qPCR [Order: VCMVU]                                                             | Order  | 87497 | Exclude<br>(order not result) |                                                                                                        |
| CMV                    | CMV DNA qPCR, Blood [Order: VBCMV]                                                      | Order  | 87497 | Exclude<br>(order not result) |                                                                                                        |
| CMV                    | CMV DNA, QUANTITATION; PCR [Order: QCMV]                                                | Order  | 87497 | Exclude<br>(order not result) |                                                                                                        |
| CMV                    | CMV DNA, Quantitative PCR EX [Order: VCMV EX]                                           | Order  | 87497 | Exclude<br>(order not result) |                                                                                                        |
| CMV                    | CMV DNA, QUANTITATIVE, ENDPT [Order: QCMVEP]                                            | Order  | 87497 | Exclude<br>(order not result) |                                                                                                        |
| CMV                    | CMV IGG ANTIBODY BY EIA [Order: CMVGE]                                                  | Order  | 86644 | Exclude<br>(order not result) |                                                                                                        |
| CMV                    | CMV IGG ANTIBODY TITER BY IFA [Order: CMVGT]                                            | Order  | 86644 | Exclude<br>(order not result) |                                                                                                        |
| CMV                    | CMV IGM ANTIBODY TITER [Order: CMVMT]                                                   | Order  | 86644 | Exclude<br>(order not result) |                                                                                                        |
| CMV                    | CMV PCR Qual (tissue) [Order: VCMQL]                                                    | Order  | 87496 | Exclude<br>(order not result) | Tissue pathology not used in cCMV except placenta which would be in in the mother's chart              |
| CMV                    | CMV qPCR (aqueous fluid) [Order: VCMAQ]                                                 | Order  | 87497 | Exclude<br>(order not result) | Aqueous fluid not used to test for cCMV                                                                |
| CMV                    | CMV qPCR (BAL) 5500 [Order: VCMBL]                                                      | Order  | 87497 | Exclude<br>(order not result) | Bronchiolavage fluid not used to test for cCMV                                                         |
| CMV                    | CMV qPCR (Bone Marrow) 5500 [Order: VCMBM]                                              | Order  | 87497 | Exclude<br>(order not result) | Bone Marrow not used to test for cCMV                                                                  |
| CMV                    | CMV qPCR (vitreous fluid) [Order: VCMVF]                                                | Order  | 87497 | Exclude<br>(order not result) | Vitreous (eye) fluid not used to test for cCMV                                                         |
| CMV                    | CMV qPCR Quant, Fresh Tissue [Order: VCMVT]                                             | Order  | 87497 | Exclude<br>(order not result) | Fresh tissue (skin, organs etc.) not used in cCMV except placenta which would be in the mother's chart |
| CMV                    | CMV qPCR, CSF [Order: VCMVC]                                                            | Order  | 87497 | Exclude<br>(order not result) |                                                                                                        |
| CMV                    | CMV Quant by PCR, Blood Spot [Order: UWCBS]                                             | Order  | 87497 | Exclude<br>(order not result) |                                                                                                        |
| CMV                    | CMV Resistance: Maribavir, Ganciclovir, Foscarnet, Cidofovir [Order: VCMR4]             | Order  | 87910 | Exclude<br>(order not result) | This test used for immunosuppressed patients on long-term                                              |

|     |                                                                     |        |                   |                               |                                                                                             |
|-----|---------------------------------------------------------------------|--------|-------------------|-------------------------------|---------------------------------------------------------------------------------------------|
|     |                                                                     |        |                   |                               | antivirals not to diagnose<br>cCMV                                                          |
| CMV | CMV Titers EX [Order: CMV EX]                                       | Order  | 86644             | Exclude<br>(order not result) |                                                                                             |
| CMV | COMPREHENSIVE RESP VIRAL<br>CULT [Order: CRCMV]                     | Order  | 87507             | Exclude<br>(order not result) | Used for upper respira-<br>tory<br>infections, never concern<br>for<br>congenital infection |
| CMV | Cytomegalovirus by Rapid PCR<br>[Order: LCCMV]                      | Order  | 87254<br>or 87252 | Exclude<br>(order not result) |                                                                                             |
| CMV | CYTOMEGALOVIRUS<br>CULTURE [Order: CMVCULT]                         | Order  | 87254<br>or 87252 | Exclude<br>(order not result) |                                                                                             |
| CMV | Cytomegalovirus DNA,<br>Quantitation [Order: OCMV]                  | Order  | 87497             | Exclude<br>(order not result) |                                                                                             |
| CMV | Cytomegalovirus IgG, Qual<br>[Order: CMVG]                          | Order  | 86644             | Exclude<br>(order not result) |                                                                                             |
| CMV | Cytomegalovirus IgM, Qual<br>[Order: CMVM]                          | Order  | 86645             | Exclude<br>(order not result) |                                                                                             |
| CMV | Donor Anti-CMV [Order: DCMV]                                        | Order  |                   | Exclude<br>(order not result) |                                                                                             |
|     |                                                                     |        |                   |                               |                                                                                             |
| CMV | External Lab CMV DNA,<br>Quantitative PCR (QUEST)<br>[Order: QVCMV] | Order  | 87497             | Exclude<br>(order not result) |                                                                                             |
| CMV | External Lab CMV IgG and IgM Quant<br>Titers [Order: XCMVQ]         | Order  | 86644             | Exclude<br>(order not result) |                                                                                             |
| CMV | External Lab CMV Qual PCR<br>(copies/mL) [Order: XVC2Q]             | Order  | 87496             | Exclude<br>(order not result) |                                                                                             |
| CMV | External Lab CMV Qual PCR (IU/mL)<br>[Order: XVCMQ]                 | Order  | 87496             | Exclude<br>(order not result) |                                                                                             |
| CMV | External Lab CMV Quantitative (cop-<br>ies/mL) [Order: XVCM2]       | Order  | 87497             | Exclude<br>(order not result) |                                                                                             |
| CMV | External Lab CMV Titers (QUEST) [Or-<br>der: QCMVG]                 | Order  |                   | Exclude<br>(order not result) |                                                                                             |
| CMV | SHELL VIAL-CMV BY IFA<br>[Order: SVCMV]                             | Order  | 87252; 87254      | Exclude<br>(order not result) | Type of culture                                                                             |
| CMV | VIRAL CULTURE EXCLUDING CMV<br>[Order: VCULT]                       | Order  | 87254 or<br>87252 | Exclude<br>(order not result) |                                                                                             |
| CMV | VIRAL CULTURE INCLUDING CMV<br>[Order: CVCULT]                      | Order  | 87254 or<br>87252 | Exclude<br>(order not result) |                                                                                             |
| CMV | VIRAL RESP CULTURE-<br>GENERAL/CMV [Order: RCMV]                    | Order  | 87254 or<br>87252 | Exclude<br>(order not result) |                                                                                             |
| CMV | CMV ANTIGENEMIA<br>[Result: CMVAG]                                  | Result | 87496             | Include                       |                                                                                             |
| CMV | CMV DNA qPCR [Result: VCMV]                                         | Result | 87497             | Include                       |                                                                                             |
| CMV | CMV DNA qPCR Result<br>[Result: VCMVR]                              | Result | 87497             | Include                       |                                                                                             |
| CMV | CMV DNA qPCR, Blood<br>[Result: VBCMV]                              | Result | 87497             | Include                       |                                                                                             |
| CMV | CMV DNA, QN PCR EX (QUEST) [Re-<br>sult: X0217]                     | Result | 87497             | Include                       |                                                                                             |
| CMV | CMV DNA, QN REAL TIME PCR EX<br>(QUEST) [Result: X0118]             | Result | 87497             | Include                       |                                                                                             |
| CMV | CMV DNA, QUANTITATION; PCR<br>[Result: QCMV]                        | Result | 87497             | Include                       |                                                                                             |

|     |                                                          |        |       |         |                                                                             |
|-----|----------------------------------------------------------|--------|-------|---------|-----------------------------------------------------------------------------|
| CMV | CMV DNA, Quantitative PCR (copies/mL) EX [Result: X2VCM] | Result | 87497 | Include |                                                                             |
| CMV | CMV DNA, Quantitative PCR EX [Result: VCMV EX]           | Result | 87497 | Include |                                                                             |
| CMV | CMV DNA, Quantitative PCR EX [Result: XXVCM]             | Result | 87497 | Include |                                                                             |
| CMV | CMV DNA, QUANTITATIVE, ENDPT [Result: QCMVEP]            | Result | 87497 | Include |                                                                             |
| CMV | CMV IGG ANTIBODY BY EIA [Result: CMVGE]                  | Result | 86644 | Include |                                                                             |
| CMV | CMV IgG Antibody, Qualitative [Result: CMVGI]            | Result | 86644 | Include |                                                                             |
| CMV | CMV IGG EX [Result: CMV IGG EX]                          | Result | 86644 | Include |                                                                             |
| CMV | CMV IgG EX [Result: XCMVG]                               | Result | 86644 | Include |                                                                             |
| CMV | CMV IgG EX (QUEST) [Result: X0160]                       | Result | 86644 | Include |                                                                             |
| CMV | CMV IgG Titer Quant EX [Result: XXCMG]                   | Result | 86644 | Include |                                                                             |
| CMV | CMV IGM ANTIBODY TITER [Result: CMVMT]                   | Result | 86645 | Include |                                                                             |
| CMV | CMV IgM Antibody, Qualitative [Result: CMVMI]            | Result | 86645 | Include |                                                                             |
| CMV | CMV IGM EX [Result: CMV IGM EX]                          | Result | 86645 | Include |                                                                             |
| CMV | CMV IgM EX [Result: XCMVM]                               | Result | 86645 | Include |                                                                             |
| CMV | CMV IgM Titer Quant EX [Result: XXCMM]                   | Result | 86645 | Include |                                                                             |
| CMV | CMV PCR Qual, Tissue [Result: Z1115]                     | Result | 87497 | Exclude | Tissue not used in cCMV except if placenta which would be in mother's chart |
| CMV | CMV qPCR (aqueous fluid) 5500 [Result: Z1116]            | Result | 87497 | Exclude | Aqueous fluid not used to test for cCMV                                     |
| CMV | CMV qPCR (Bone Marrow) 5500 [Result: Z1044]              | Result | 87497 | Exclude | Bone marrow not used to test for cCMV                                       |
| CMV | CMV qPCR (vitreous fluid) 5500 [Result: Z1119]           | Result | 87497 | Exclude | Vitreous (eye) fluid not used to test for cCMV                              |
| CMV | CMV qPCR Quant Result, Tissue [Result: Z0992]            | Result | 87497 | Exclude | Tissue not used in cCMV except if placenta which would be in mother's chart |
| CMV | CMV qPCR Quant, Type of Tissue [Result: Z0993]           | Result | 87497 | Exclude | Tissue not used in cCMV except if placenta which would be in mother's chart |
| CMV | CMV QPCR Result [Result: Z2357]                          | Result | 87497 | Include |                                                                             |
| CMV | CMV Qual PCR (copies/mL) EX [Result: XXVC2]              | Result | 87497 | Include |                                                                             |
| CMV | CMV Qual PCR (IU/mL) EX [Result: XXCMV]                  | Result | 87497 | Include |                                                                             |

|     |                                                    |        |                |         |                                                                       |
|-----|----------------------------------------------------|--------|----------------|---------|-----------------------------------------------------------------------|
| CMV | CMV Result, CSF [Result: Z0910]                    | Result | 87497 or 87254 | Include |                                                                       |
| CMV | CMV Result, Urine [Result: Z0909]                  | Result | 87497 or 87254 | Include |                                                                       |
| CMV | COMPREHENSIVE RESP VIRAL CULT [Result: CRCMV]      | Result | 87633          | Exclude | Test used for upper respiratory infections not for cCMV               |
| CMV | Cytomegalovirus by Rapid PCR [Result: LCCMV]       | Result | 87254 or 87252 | Include |                                                                       |
| CMV | CYTOMEGALOVIRUS CULTURE [Result: CMVCULT]          | Result | 87254 or 87252 | Include |                                                                       |
| CMV | QCMV Log10 Result: [Result: QCMVRL]                | Result |                | Include |                                                                       |
| CMV | QCMV M2000 Interpretation Result: [Result: QCMVRI] | Result | 87497          | Include | Interpretation always paired with quantitative or qualitative results |
| CMV | QCMV Result: [Result: QCMVR]                       | Result |                | Include |                                                                       |
| CMV | SHELL VIAL-CMV BY IFA [Result: SVCMV]              | Result | 87252; 87254   | Include | Type of culture                                                       |
| CMV | VIRAL CULTURE EXCLUDING CMV [Result: VCULT]        | Result | 87254 or 87252 | Include |                                                                       |
| CMV | VIRAL CULTURE INCLUDING CMV [Result: CVCULT]       | Result | 87254 or 87252 | Include |                                                                       |
| CMV | VIRAL RESP CULTURE-GENERAL/CMV [Result: RCMV]      | Result | 87254 or 87252 | Exclude | Respiratory cultures used for respiratory infections, not cCMV test   |

**Table S2.** Data elements and definitions.

|                          |                         |                       |                                               |               | Data from clinical medical record, laboratory records, EHR only applicable for CMV test cohort in the days prior to CMV testing (not after)                                                                                                                                                                                                                                                                             | Data from EHR ≤ 31 days                                                                            |
|--------------------------|-------------------------|-----------------------|-----------------------------------------------|---------------|-------------------------------------------------------------------------------------------------------------------------------------------------------------------------------------------------------------------------------------------------------------------------------------------------------------------------------------------------------------------------------------------------------------------------|----------------------------------------------------------------------------------------------------|
| Variable name            | Type of variable        | Units                 | Response options/formatting                   | Data source * | Further definition/where located in chart for co-located in chart for larger cohort tested for CMV                                                                                                                                                                                                                                                                                                                      | Further definition/where NOT tested for CMV (if different)                                         |
| <b>Subject ID</b>        | Whole number            | NA                    | #####                                         | NA            | Indirect identifiers created by DataDirect [11].                                                                                                                                                                                                                                                                                                                                                                        |                                                                                                    |
| <b>DOB</b>               | Date                    | NA                    | MM/DD/YYYY                                    | 0             | Discrete data from EHR by DataDirect [11].                                                                                                                                                                                                                                                                                                                                                                              |                                                                                                    |
| <b>Sex</b>               | Categorical             | NA                    | 0=Male, 1=Female, 2=Unknown                   | 0             | Unknown if not apparent or "intersex". Discrete data from EHR by DataDirect [11].                                                                                                                                                                                                                                                                                                                                       |                                                                                                    |
| <b>GA</b>                | Continuous              | Weeks <sup>days</sup> | WW <sup>D</sup> (days = X/7 fraction)         | 2             | Discrete data from EHR for all inborn infants. Data manually abstracted by reviewing the birth/delivery or transfer of care notes for outborn infants in the CMV test cohort.                                                                                                                                                                                                                                           | Only able to ascertain for inborn infants in this group via data pull from EHR.                    |
| <b>Delivery</b>          | Binomial                | NA                    | 0=Vaginal, 1=C-Section                        | 2             | Discrete data from EHR for all inborn infants. Data manually abstracted by reviewing the birth/delivery or transfer of care notes for outborn infants in the CMV test cohort.                                                                                                                                                                                                                                           | Only able to ascertain for inborn infants in this group via data pull from EHR.                    |
| <b>Maternal Age</b>      | Whole number            | Years                 | ##                                            | 2             | Maternal age at delivery. Discrete data from EHR for all inborn infants. Data manually abstracted by reviewing the birth/delivery or transfer of care notes for outborn infants in the CMV test cohort.                                                                                                                                                                                                                 | Only able to ascertain for inborn infants in this group via data pull from EHR.                    |
| <b>Maternal Parity</b>   | Whole number            | Live born children    | #                                             | 2             | Number of live born children at time of subject infant's birth (counting that infant), range of 0 (if stillborn first child) to X. Discrete data from EHR for all inborn infants. Data manually abstracted by reviewing the birth/delivery or transfer of care notes for outborn infants in the CMV test cohort.                                                                                                        | Only able to ascertain for inborn infants in this group via data pull from EHR.                    |
| <b>Baby Race</b>         | Descriptive categorical | NA                    | 0=White, 1=Black, 2=Asian, 3=Other, 4=Unknown | 0             | Race as identified in the EHR.. "Other" includes Native American, pacific islander, Native Alaskan etc. If baby had two or more races listed, the program defaults to selecting the first race listed. Biracial was not an option. Unknown if not listed in discrete field of record.                                                                                                                                   |                                                                                                    |
| <b>Baby Ethnicity</b>    | Categorical             | NA                    | 0=Hispanic, 1=Non-Hispanic, 2=Unknown         | 0             | Ethnicity as identified in the EHR. Unknown if not listed in discrete field of record.                                                                                                                                                                                                                                                                                                                                  |                                                                                                    |
| <b>Baby Insurance</b>    | Categorical             | NA                    | 0=Public, 1=Private/Commercial/Other          | 0             | Primary insurance type as listed in the EHR. Public insurance defined as primary insurance being Medicaid (having Medicaid secondary insurance to a primary private/commercial plan not counted as Medicaid). Other if self-pay or unknown.                                                                                                                                                                             |                                                                                                    |
| <b>Delivery Location</b> | Binomial                | NA                    | 0=Inborn, 1=Outborn                           | 0             | Location where infant was born. Inborn is at study institution. Outborn is anywhere else.                                                                                                                                                                                                                                                                                                                               | Subjects with birth records at study institution considered inborn, all others considered outborn. |
| <b>Test Date</b>         | Date                    | NA                    | MM/DD/YYYY                                    | 1             | Date that the test for CMV was collected (e.g., specimen collected, which could be different from the date the test was ordered or the results returned). If multiple CMV tests ordered, include only data for the first test resulted). Data found in the laboratory results and/or orders tabs of the EHR. Must see the laboratory test and result, not just read a descriptive sentence about it in a clinical note. |                                                                                                    |

|                            |             |    |                                                            |                            |                                                                                                                                                                                                                                                                                                                                                                                                                                                                                                                                                                                                                                                                                                                                                                                                                                                                                           |                                                                                 |
|----------------------------|-------------|----|------------------------------------------------------------|----------------------------|-------------------------------------------------------------------------------------------------------------------------------------------------------------------------------------------------------------------------------------------------------------------------------------------------------------------------------------------------------------------------------------------------------------------------------------------------------------------------------------------------------------------------------------------------------------------------------------------------------------------------------------------------------------------------------------------------------------------------------------------------------------------------------------------------------------------------------------------------------------------------------------------|---------------------------------------------------------------------------------|
| <b>Test Type</b>           | Categorical |    | 0=CMV PCR,<br>1 = CMV<br>IgG/IgM,<br>2= CMV Cx,<br>3=Other | 1                          | Type of test that was first ordered to test for CMV . If multiple CMV tests ordered, include only data for the first test resulted. Data found in the laboratory results and/or orders tabs of the EHR. Must see the laboratory test and result, not just read a descriptive sentence about it in a clinical note. CMV PCR = polymerase chain reaction test (or send out NAAT) of any fluid (serum/plasma, dried blood spot, urine, CSF, and hypothetically saliva although not available at this institution), CMV IgG/IgM = any CMV antibody testing performed on the infant. Maternal antibody testing is not to be counted. CMV culture = viral culture of bodily fluid (urine, CSF, or serum/plasma) that includes CMV. Does not include viral cultures of bone marrow or respiratory secretions. 3=Other includes anything else. Please include free text description of this test. | NA                                                                              |
| <b>CMV Status</b>          | Binomial    | NA | 0=Negative,<br>1=Positive                                  | 1                          | Results of the CMV test qualitatively - was CMV isolated or not? Do not include units/ML or other quantitative information here. Considered positive if CMV identified in the test and no notes included about poor sample, or ambiguous.                                                                                                                                                                                                                                                                                                                                                                                                                                                                                                                                                                                                                                                 | NA                                                                              |
| <b>CMV Type</b>            | Binomial    | NA | 0=cCMV,<br>1=pnCMV                                         | 1                          | Type of CMV that the clinical team was evaluating the infant for congenital (cCMV) or postnatal (pnCMV) [12]. Data found by reviewing the clinical notes surrounding the dates of the testing, and if not clear, then any subsequent consultation notes (e.g., from Pediatric Infectious Disease specialists) if ambiguity were to arise.                                                                                                                                                                                                                                                                                                                                                                                                                                                                                                                                                 | NA                                                                              |
| <b>Birth Wt</b>            | Number      | kg | #####                                                      | 2                          | Birthweight as recorded in EHR, double check with discrete field. Weight on day of life "0" not DOL 1.                                                                                                                                                                                                                                                                                                                                                                                                                                                                                                                                                                                                                                                                                                                                                                                    | Only able to ascertain for inborn infants in this group via data pull from EHR. |
| <b>Birth Wt%ile (WHO)*</b> | Percentile  | NA | ###%ile                                                    | Calc'd BW, sex, GA by- WHO | Birthweight by percentile if ≥37 weeks using WHO growth chart [12]. Discrete data from EHR for all inborn infants. Data manually abstracted by reviewing the birth/delivery or transfer of care notes for outborn infants in the CMV test cohort.                                                                                                                                                                                                                                                                                                                                                                                                                                                                                                                                                                                                                                         | Only able to calculate for inborn infants in this group via data pull from EHR. |

|                               |            |    |                              |                              |                                                                                                                                                                                                                                                      |                                                                                 |
|-------------------------------|------------|----|------------------------------|------------------------------|------------------------------------------------------------------------------------------------------------------------------------------------------------------------------------------------------------------------------------------------------|---------------------------------------------------------------------------------|
| <b>Birth Wt%ile (Fenton)*</b> | Percentile | NA | ###%ile                      | Calc'd BW, sex, GA by Fenton | Birthweight by percentile if <37 weeks using Fenton growth chart [13]. Discrete data from EHR for all inborn infants. Data manually abstracted by reviewing the birth/delivery or transfer of care notes for outborn infants in the CMV test cohort. | Only able to calculate for inborn infants in this group via data pull from EHR. |
| <b>SGA</b>                    | Binary     | NA | 0=Yes,<br>1=No,<br>2=Unknown |                              | Birth measurement defined as <10%ile for gestational age/sex [12, 13].                                                                                                                                                                               |                                                                                 |
| <b>Birth Length</b>           | Number     | cm | ##                           | 2                            | Discrete data from EHR for all inborn infants. Data manually abstracted by reviewing the birth/delivery or transfer of care notes for outborn infants in the CMV test cohort.                                                                        | Only able to calculate for inborn infants in this group via data pull from EHR. |

|                              |            |    |                             |                              |                                                                                                                                                                                                                                                                                                                                                                                                                                                                                                                                                                                                          |                                                                                 |
|------------------------------|------------|----|-----------------------------|------------------------------|----------------------------------------------------------------------------------------------------------------------------------------------------------------------------------------------------------------------------------------------------------------------------------------------------------------------------------------------------------------------------------------------------------------------------------------------------------------------------------------------------------------------------------------------------------------------------------------------------------|---------------------------------------------------------------------------------|
| <b>Birth HC</b>              | Number     | cm | ##                          | 2                            | Discrete data from EHR for all inborn infants. Data manually abstracted by reviewing the birth/delivery or transfer of care notes for outborn infants in the CMV test cohort. Note if reviewing the growth chart, and there are several measurements in the first days of life, with the first measurement being an outlier (much smaller than others), this may not represent true microcephaly but rather molding. In this case, consider the HC measurement that is in line with following measurements in the chart, not the outlier. Do not chose HC measurements taken outside first week of life. | Only able to calculate for inborn infants in this group via data pull from EHR. |
| <b>Birth HC%ile (WHO)</b>    | Percentile | NA | ##%ile                      | Calc'd HC, sex, GA by WHO    | Head circumference by percentile if ≥37 weeks using WHO growth chart [12]. Discrete data from EHR for all inborn infants. Data manually abstracted by reviewing the birth/delivery or transfer of care notes for outborn infants in the CMV test cohort.                                                                                                                                                                                                                                                                                                                                                 | Only able to calculate for inborn infants in this group via data pull from EHR. |
| <b>Birth HC%ile (Fenton)</b> | Percentile | NA | ##%ile                      | Calc'd HC, sex, GA by Fenton | Head circumference by percentile if <37 weeks using Fenton growth chart [13]. Discrete data from EHR for all inborn infants. Data manually abstracted by reviewing the birth/delivery or transfer of care notes for outborn infants in the CMV test cohort.                                                                                                                                                                                                                                                                                                                                              | Only able to calculate for inborn infants in this group via data pull from EHR. |
| <b>Microcephaly</b>          | Binary     | NA | 0=Present, 1=Absent/unknown | 2                            | Birth measurement defined as <10%ile for gestational age/sex [12,13].                                                                                                                                                                                                                                                                                                                                                                                                                                                                                                                                    |                                                                                 |

|                     |        |    |                             |   |                                                                                                                                                                                                                                                                                                                                      |                                                                                                                                                         |
|---------------------|--------|----|-----------------------------|---|--------------------------------------------------------------------------------------------------------------------------------------------------------------------------------------------------------------------------------------------------------------------------------------------------------------------------------------|---------------------------------------------------------------------------------------------------------------------------------------------------------|
| <b>Petechiae</b>    | Binary | NA | 0=Present, 1=Absent/unknown | 2 | Review of clinical notes, and especially physical exams within the notes leading up to the CMV test. Presence of petechiae, petechial rash, purple pinpoint rash, purpuric rash in physical exam and/or assessment and plan.                                                                                                         | Presence vs absence of diagnosis of petechiae in medical record. Defined as ICD-9-CM 772.6, 782.7; ICD-10-CM P54.5 [14,15]                              |
| <b>Jaundice</b>     | Binary | NA | 0=Present, 1=Absent/unknown | 2 | Review of clinical notes, and especially physical exams within the notes leading up to the CMV test. Presence of jaundice in physical exam and/or elevated total bilirubin.                                                                                                                                                          | Presence vs absence of diagnosis of jaundice in medical record. Defined as ICD-9-CM 774; ICD-10-CM P58.x or P59.x [14]                                  |
| <b>Seizures</b>     | Binary | NA | 0=Present, 1=Absent/unknown | 2 | Review of clinical notes (including consultations from Pediatric Neurology or EEG monitoring reports) for epilepsy or seizures. Do not count "concern for seizures" if this has been ruled out. But count "seizures" if this appears to be a sign that is believed to be true at the time of testing (even if eventually ruled out). | Presence vs absence of diagnosis of seizures (and related terms) in medical record. Defined as 345.X and 780.3, 780.x, or 779.0 [16]                    |
| <b>Splenomegaly</b> | Binary | NA | 0=Present, 1=Absent/unknown | 2 | Review of clinical notes, especially physical exams within the notes leading up to the CMV test. Presence of splenomegaly, enlarged spleen, HSM in physical exam finding and/or assessment and plan.                                                                                                                                 | Presence vs absence of diagnosis of splenomegaly in medical record. Defined as ICD- 9-CM 759.0, 789.2; ICD-10-CM Q89.09, R16.1, or R16.2 [14,15]        |
| <b>Hepatomegaly</b> | Binary | NA | 0=Present, 1=Absent/unknown | 2 | Review of clinical notes, especially physical exams within the notes leading up to the CMV test. Presence of hepatomegaly, enlarged liver, liver span below costal                                                                                                                                                                   | Presence vs absence of diagnosis of hepatomegaly in medical record. Defined as ICD- 9-CM 751.69, 789.1; ICD-10-CM Q44.7, R16.0, R16.2, or B25.1 [14,15] |



|                                            |        |    |                             |   |                                                                                                                                                                        |                                                                                                                                                                                                                                             |
|--------------------------------------------|--------|----|-----------------------------|---|------------------------------------------------------------------------------------------------------------------------------------------------------------------------|---------------------------------------------------------------------------------------------------------------------------------------------------------------------------------------------------------------------------------------------|
|                                            |        |    |                             |   | margin, HSM in physical exam finding and/or assessment and plan.                                                                                                       |                                                                                                                                                                                                                                             |
| <b>Thrombocytopenia (&lt;150)</b>          | Binary | NA | 0=Present, 1=Absent/unknown | 2 | Presence of at least one visualized laboratory result of platelets <150,000 K/uL. Need to see lab results, not just mentioned in the notes.                            | Presence vs absence of diagnosis of thrombocytopenia in medical record. Defined as ICD-9-CM 776.1, 776.2, 287.3–287.5; ICD-10-CM P60, P61.0, or D69.4x-D69.6x [14,15]. Or one laboratory value of platelets <150,000 K/uL (LOINC 777-3) [3] |
| <b>Direct Hyperbilirubinemia (DB&gt;3)</b> | Binary | NA | 0=Present, 1=Absent/unknown | 2 | Presence of at least one visualized laboratory result of direct or conjugated bilirubin level of >3.0 mg/dL. Need to see lab results, not just mentioned in the notes. | Presence vs absence of diagnosis of direct or conjugated hyperbilirubinemia in medical record or one laboratory value of direct/conjugated bilirubin >3 mg/dL [3]                                                                           |
| <b>Transaminitis (AST&gt;80)</b>           | Binary | NA | 0=Present, 1=Absent/unknown | 2 | Presence of at least one visualized laboratory result of AST >80 IU/L. Need to see lab results, not just mentioned in the notes.                                       | Presence vs absence of diagnosis of transaminitis in medical record or one laboratory value of AST >80 IU/L [3]                                                                                                                             |

|                                        |        |    |                                       |   |                                                                                                                                                                                                                                                                                                                                                                                                                                     |                                                                                                                                                                                                                                                                                        |
|----------------------------------------|--------|----|---------------------------------------|---|-------------------------------------------------------------------------------------------------------------------------------------------------------------------------------------------------------------------------------------------------------------------------------------------------------------------------------------------------------------------------------------------------------------------------------------|----------------------------------------------------------------------------------------------------------------------------------------------------------------------------------------------------------------------------------------------------------------------------------------|
| <b>Transaminitis (ALT &gt;100)</b>     | Binary | NA | 0=Present, 1=Absent/unknown           | 2 | Presence of at least one visualized laboratory result of ALT >100 IU/L. Need to see lab results, not just mentioned in the notes.                                                                                                                                                                                                                                                                                                   | Presence vs absence of diagnosis of transaminitis in medical record or one laboratory value of ALT>100 IU/L [3]                                                                                                                                                                        |
| <b>Referred Newborn Hearing Screen</b> | Binary | NA | 0=Present, 1=Absent/unknown           | 2 | Review of clinical notes or audiograms from birth hospital. Presence of “refer” hearing screen in one or both ears on audiogram. Because hearing screens can be repeated in the same admission, count the “final hearing screen” prior to the CMV test.                                                                                                                                                                             | Presence vs absence of diagnosis of failed newborn hearing screen in medical record. Defined as ICD-9 CMV 794.15, ICD-10 P09 [17,18]. Or encounter for hearing examination following failed hearing screening in medical record. Defined as r94.120, R94.8 z01.118, or Z01.110 [17,18] |
| <b>Intracranial Abnormality</b>        | Binary | NA | 0=Present, 1=Absent/unknown           | 2 | Review of cranial imaging reports obtained within ≤ 31 days. Presence of abnormalities including ventriculomegaly, intracerebral calcifications, periventricular echogenicity, cortical or cerebellar malformations [3].                                                                                                                                                                                                            | Presence vs absence of diagnosis of intracranial abnormalities in medical record. Defined as ICD-9-CM 348.89, 742.2–742.4, 793.0; ICD-10-CM G91.xx, G93.89, G93.9, Q03.xx, Q04.xx, or R90.82 [14]                                                                                      |
| <b>Retinitis</b>                       | Binary | NA | 0=Present, 1=Absent/unknown           | 2 | Review of clinical notes from Ophthalmology. Presence of chorioretinitis on exam. Do not count retinopathy of prematurity or ocular issues attributable to other obvious causes. If Ophthalmology not consulted, mark as unknown.                                                                                                                                                                                                   | Presence vs absence of diagnosis of chorioretinal/retinitis in medical record. Defined as ICD-9-CM 363.0–3; ICD-10-CM H30.0x, H30.1x, H30.89x, H30.9x, or H31.00x [14]                                                                                                                 |
| <b>Prenatal concern for cCMV</b>       | Binary | NA | 0=Present, 1=Absent/unknown           | 1 | Review of clinical notes, especially initial History and Physical Exam note which references maternal, pregnancy, and prenatal history if available (linked maternal/neonatal charts in the EHR). Direct access to maternal chart unavailable. Presence of prenatal concerns includes maternal CMV serologies, abnormal ultrasound findings, abnormal amniocentesis results, and/or obstetric and/or maternal fetal medicine notes. | NA. Data only collected for infants tested for CMV.                                                                                                                                                                                                                                    |
| <b>Unit for Admission s/p Birth</b>    | Binary | NA | 0=NICU, 1=PCTU, 2=NBN, 3=PICU, 4=Home | 1 | Clinical unit where the infant was admitted and cared for immediately after birth.                                                                                                                                                                                                                                                                                                                                                  | NA. Data only collected for infants tested for CMV.                                                                                                                                                                                                                                    |

|                                |           |    |                                                   |   |                                                                                                                                                                                                                                                                                                                                                                                                                                                                                                                                                                                                                                         |                                                     |
|--------------------------------|-----------|----|---------------------------------------------------|---|-----------------------------------------------------------------------------------------------------------------------------------------------------------------------------------------------------------------------------------------------------------------------------------------------------------------------------------------------------------------------------------------------------------------------------------------------------------------------------------------------------------------------------------------------------------------------------------------------------------------------------------------|-----------------------------------------------------|
| <b>Unit that Obtained Test</b> | Binary    | NA | 0=NICU,<br>1=PCTU,<br>2=NBN,<br>3=PICU,<br>4=Peds | 1 | Clinical unit and/or service where the infant was cared for by healthcare provider who ordered CMV testing. Unit may differ from the admission unit after birth.                                                                                                                                                                                                                                                                                                                                                                                                                                                                        | NA. Data only collected for infants tested for CMV. |
| <b>Cardiac Baby</b>            | Binary    | NA | 0=Yes,<br>1=No                                    | 1 | Review of clinical notes. Presence of critical congenital cardiac defects necessitating admission and care in the Pediatric Cardiac Intensive Care Unit (PCTU), whose primary care team was Pediatric Cardiology, or whether testing for CMV was ordered by a Pediatric Cardiologist as part of a heart transplant evaluation. This does not include a preterm infant in the NICU with a cardiac complication whose care is not mainly directed by Pediatric Cardiology.                                                                                                                                                                | NA. Data only collected for infants tested for CMV. |
| <b>Screening Indication</b>    | Free text | NA | Free text                                         | 1 | Review of the clinical notes leading up to the CMV test. Presence of the documented testing indication(s) that prompted the provider to order CMV test. Indication(s) defined as the reason(s) the provider specifically documented as to why CMV test was ordered. If problem-based plan, then include the "problem" under which the CMV test is ordered. If systems-based plan, then include the "system" under which the CMV test is ordered. Do not include any signs that are not specifically documented as raising concerns for CMV or prompting testing (i.e. clinical findings which may differ from indications for testing). | NA. Data only collected for infants tested for CMV. |

\* **0=**Pulled by DataDirect or Oracle/Clarity from institution EHR (discrete fields), **1=Manually** identified by review of the clinical record (CMV test cohort only), **2=Data pull for inborn infants in larger cohort, manual review** of clinical record of CMV test cohort

Abbreviations: ID- identification; DOB-date of birth; EHR-electronic health record; GA-gestational age; CMV-cytomegalovirus; NA-not applicable; PCR-polymerase chain reaction; Cx- culture; DOL-day of life; wt- weight; HC- head circumference; kg- kilograms; cm-centimeters; HSM-hepatosplenomegaly; s/p-status post; NICU- Neonatal Intensive Care Unit; NBN- Newborn Nursery; PCTU- Pediatric Cardiac Thoracic Unit; PICU- Pediatric Intensive Care Unit; Peds- General Pediatrics.
